# Supplementary material for: Drosophila p53 isoforms have overlapping and distinct functions in germline genome integrity and oocyte quality control
Source: eLife. 2022 Jan 13;11:e61389. doi: 10.7554/eLife.61389 (PMC8758136; doi:10.7554/eLife.61389)
Supplement: Figure 2—source data 1. [file elife-61389-fig2-data1.xlsx]

## Sheet: Soma
yw +Ir			null +Ir			Acrispr +IR			Bcrispr +IR
rep1	rep2		rep1	rep2		rep1	rep2		rep1	rep2
29	34		3	3		2	0		24	20
32	31		0	2		0	0		28	36
17	23		1	2		3	5		21	34
38	13		0	2		0	2		21	30
31	13		4	2		3	5		34	34
31	29		0	0		3	0		34	26
33	39		0	0		0	4		22	30
35	29		3	0		6	4		50	30
27	27		2	0		0	0		29	26
39	33		0	3		6	0		27	29

## Sheet: Ananlysis soma
analysis
yw +Ir			null +Ir			Acrispr +IR			Bcrispr +IR			yw -IR
rep1	rep2		rep1	rep2		rep1	rep2		rep1	rep2		rep1	rep2
29	34		3	3		2	0		24	20		3	0
32	31		0	2		0	0		28	36		0	1
17	23		1	2		3	5		21	34		2	2
38	13		0	2		0	2		21	30		2	0
31	13		4	2		3	5		34	34		0	3
31	29		0	0		3	0		34	26		0	2
33	39		0	0		0	4		22	30		0	0
35	29		3	0		6	4		50	30		5	0
27	27		2	0		0	0		29	26		0	2
39	33		0	3		6	0		27	29		2	2
31.2	27.1		1.3	1.4		2.3	2		29	29.5		1.4	1.2
			av	stdev
		yw-IR	1.1	0.141421
		yw+IR	29.15	2.89914
		null +IR	1.35	0.0707107
		Acrispr +IR	2.15	0.212132
		Bcrispr +IR	29.25	0.353553

## Sheet: Sheet4
	Germline			soma		av	stdev
		avg	std dev		yw-IR	1.1	0.141421
	yw-IR	0.9	0.212		yw+IR	29.15	2.89914
	yw+IR	12.85	0.424		null +IR	1.35	0.0707107
	null+IR	1.5	0.524		Acrispr +IR	2.15	0.212132
	acrispr +IR	1.95	0.494		Bcrispr +IR	29.25	0.353553
	bcrispr +IR	12.15	0.3535
					germline	soma
				YW-IR	0.9	1.1		YW-IR	1.1
				YW+IR	12.85	29.15		YW+IR	29.15
				Null +IR	1.5	1.35		Null +IR	1.35
				Acrispr +IR	1.95	2.15		Acrispr +IR	2.15
				Bcrispr +IR	12.15	29.25		Bcrispr +IR	29.25
