# Supplementary material for: Drosophila p53 isoforms have overlapping and distinct functions in germline genome integrity and oocyte quality control
Source: eLife. 2022 Jan 13;11:e61389. doi: 10.7554/eLife.61389 (PMC8758136; doi:10.7554/eLife.61389)
Supplement: Figure 3—source data 1. [file elife-61389-fig3-data1.xlsx]

## Sheet: Germline
yw+IR			yw-IR			null +IR			acrispr +IR			bcrispr +Ir
rep1	rep2		rep1	rep2		rep1	rep2		rep1	rep2		rep1	rep2
17	17		0	0		0	1		2	3		12	12
18	12		0	1		0	2		0	0		13	3
11	14		2	0		0	5		2	2		4	16
6	12		2	0		0	0		0	0		13	5
12	10		0	0		4	2		3	1		9	26
15	9		0	0		8	1		10	4		17	16
12	14		5	0		0	0		0	4		14	9
11	13		3	1		0	2		6	0		13	14
16	8		0	2		1	4		0	2		19	9
12	18		0	2		0	0		0	0		10	9

## Sheet: Analysis Germline
yw+IR				yw-IR			null +IR				acrispr +IR			bcrispr +Ir
rep1	rep2			rep1	rep2		rep1	rep2			rep1	rep2		rep1	rep2
17	17			0	0		0	1			2	3		12	12
18	12			0	1		0	2			0	0		13	3
11	14			2	0		0	5			2	2		4	16
6	12			2	0		0	0			0	0		13	5
12	10			0	0		4	2			3	1		9	26
15	9			0	0		8	1			10	4		17	16
12	14			5	0		0	0			0	4		14	9
11	13			3	1		0	2			6	0		13	14
16	8			0	2		1	4			0	2		19	9
12	18	std dev		0	2	std dev	0	0	std dev		0	0	std dev	10	9
13	12.7	0.212132		1.2	0.6	0.424264	1.3	1.7	0.524741		2.3	1.6	0.494975	12.4	11.9	0.353553
			Germline
				avg	std dev
			yw-IR	0.9	0.212
			yw+IR	12.85	0.424
			null+IR	1.5	0.524
			acrispr +IR	1.95	0.494
			bcrispr +IR	12.15	0.3535

## Sheet: Sheet4
	Germline			soma		av	stdev
		avg	std dev		yw-IR	1.1	0.141421
	yw-IR	0.9	0.212		yw+IR	29.15	2.89914
	yw+IR	12.85	0.424		null +IR	1.35	0.0707107
	null+IR	1.5	0.524		Acrispr +IR	2.15	0.212132
	acrispr +IR	1.95	0.494		Bcrispr +IR	29.25	0.353553
	bcrispr +IR	12.15	0.3535
					germline	soma
				YW-IR	0.9	1.1		YW-IR	1.1
				YW+IR	12.85	29.15		YW+IR	29.15
				Null +IR	1.5	1.35		Null +IR	1.35
				Acrispr +IR	1.95	2.15		Acrispr +IR	2.15
				Bcrispr +IR	12.15	29.25		Bcrispr +IR	29.25
