# Supplementary material for: Drosophila p53 isoforms have overlapping and distinct functions in germline genome integrity and oocyte quality control
Source: eLife. 2022 Jan 13;11:e61389. doi: 10.7554/eLife.61389 (PMC8758136; doi:10.7554/eLife.61389)
Supplement: Figure 4—source data 1. [file elife-61389-fig4-data1.xlsx]

## Sheet: All three rounds combined
3 batches of staining, 5 germaria quantified per batch using LasX software, drawing circular ROI manually over region 1 and 2 germline cells - guided by HST and VASA labelling
		Mean Fluorescnece (Grays)				Batch means, global means, and standard error						Global Means
		Region 1	Region 2	Entire Germarium				Region 1	Region 2	Entire Germarium			Region 1	Region 2	Entire Germarium
p53A+B+, hidGFP -IR	1	10.87	12.35	11.61		p53A+B+, hidGFP -IR	Mean batch 1	10.774	16.596	13.685		p53A+B+, hidGFP -IR	11.616	16.914	14.265
	2	9.85	13.82	11.835			Mean batch 2	11.15	16.66	13.905		p53A+B+, hidGFP +IR	32.6573	32.502	32.3193
	3	11.95	22.45	17.2			Mean Batch 3	12.924	17.486	15.205		p53A-B-, hidGFP -IR	7.61533	7.30173	7.45853
	4	10.08	17.52	13.8			Global Mean	11.616	16.914	14.265		p53A-B-, hidGFP +IR	6.25067	7.18533	6.718
	5	11.12	16.84	13.98			Standard Error	0.662946	0.286596	0.474271		p53A-B+, hidGFP -IR	24.2033	16.1367	20.17
	6	9.68	17.54	13.61		p53A+B+, hidGFP +IR	Mean batch 1	33.786	31.67	32.728		p53A-B+, hidGFP +IR	29.024	19.626	24.325
	7	13.52	13.28	13.4			Mean batch 2	31.896	31.67	31.002		p53A+B-, hidGFP -IR	15.17	19.65	17.41
	8	10.02	20.07	15.045			Mean Batch 3	32.29	34.166	33.228		p53A+B-, hidGFP +IR	26.2853	43.7353	35.0103
	9	12.57	15.54	14.055			Global Mean	32.6573	32.502	32.3193
	10	9.96	16.87	13.415			Standard Error	0.575681	0.832	0.674296
	11	12.78	15.84	14.31		p53A-B-, hidGFP -IR	Mean batch 1	7.602	7.3872	7.4946
	12	11.99	18.06	15.025			Mean batch 2	7.51	6.634	7.072
	13	14.08	16.94	15.51			Mean Batch 3	7.734	7.884	7.809		p53A+B+, hidGFP -IR	14.265	0.474271
	14	12.5	17.58	15.04			Global Mean	7.61533	7.30173	7.45853		p53A+B+, hidGFP +IR	32.3193	0.674296
	15	13.27	19.01	16.14			Standard Error	0.065006	0.363365	0.213516		p53A-B-, hidGFP -IR	7.45853	0.213516
p53A+B+, hidGFP +IR	1	36.81	26.98	31.895		p53A-B-, hidGFP +IR	Mean batch 1	5.396	5.96	5.678		p53A-B-, hidGFP +IR	6.718	0.522257
	2	35.48	30.08	32.78			Mean batch 2	6.578	8.066	7.322		p53A-B+, hidGFP -IR	20.17	0.415954
	3	37.13	27.71	32.42			Mean Batch 3	6.778	7.53	7.154		p53A-B+, hidGFP +IR	24.325	1.03583
	4	27.51	40.72	34.115			Global Mean	6.25067	7.18533	6.718		p53A+B-, hidGFP -IR	17.41	0.568723
	5	32	32.86	32.43			Standard Error	0.431216	0.631903	0.522257		p53A+B-, hidGFP +IR	35.0103	0.712198
	6	27.5	26.75	27.125		p53A-B+, hidGFP -IR	Mean batch 1	23.704	15.048	19.376
	7	32.98	22.84	27.91			Mean batch 2	24.286	16.418	20.352
	8	30.76	35.65	33.205			Mean Batch 3	24.62	16.944	20.782
	9	29.9	30.09	29.995			Global Mean	24.2033	16.1367	20.17
	10	38.34	35.21	36.775			Standard Error	0.267637	0.565115	0.415954
	11	30.84	28.79	29.815		p53A-B+, hidGFP +IR	Mean batch 1	31.452	19.606	25.529
	12	39.84	35.48	37.66			Mean batch 2	26.386	18.14	22.263
	13	32.15	30.44	31.295			Mean Batch 3	29.234	21.132	25.183
	14	28.54	36.94	32.74			Global Mean	29.024	19.626	24.325
	15	30.08	39.18	34.63			Standard Error	1.46619	0.863774	1.03583
p53A-B-, hidGFP -IR	1	8.63	9.13	8.88		p53A+B-, hidGFP -IR	Mean batch 1	15.06	20.374	17.717
	2	9.48	1.066	5.273			Mean batch 2	15.768	20.642	18.205
	3	6.6	5.46	6.03			Mean Batch 3	14.682	17.934	16.308
	4	7.92	8.74	8.33			Global Mean	15.17	19.65	17.41
	5	5.38	12.54	8.96			Standard Error	0.318289	0.861481	0.568723
	6	6.71	6.84	6.775		p53A+B-, hidGFP +IR	Mean batch 1	28.488	41.368	34.928
	7	7.23	7.75	7.49			Mean batch 2	24.924	47.642	36.283
	8	8.99	4.99	6.99			Mean Batch 3	25.444	42.196	33.82
	9	6.38	8.37	7.375			Global Mean	26.2853	43.7353	35.0103
	10	8.24	5.22	6.73			Standard Error	1.11152	1.9679	0.712198
	11	9.5	8.65	9.075
	12	6.48	7.92	7.2
	13	7.24	6.38	6.81
	14	8.56	9.24	8.9
	15	6.89	7.23	7.06
p53A-B-, hidGFP +IR	1	4.89	5.65	5.27
	2	6.02	4.79	5.405
	3	4.68	6.54	5.61
	4	5.26	5.84	5.55
	5	6.13	6.98	6.555
	6	4.8	8.45	6.625
	7	6.74	9.12	7.93
	8	8.94	4.28	6.61
	9	5.87	10.8	8.335
	10	6.54	7.68	7.11
	11	7.59	8.65	8.12
	12	5.91	7.96	6.935
	13	6.53	6.94	6.735
	14	7.58	5.84	6.71
	15	6.28	8.26	7.27
p53A-B+, hidGFP -IR	1	20.61	12.91	16.76
	2	28.87	12.97	20.92
	3	21.65	17.84	19.745
	4	22.83	14.98	18.905
	5	24.56	16.54	20.55
	6	19.87	12.09	15.98
	7	20.08	18.72	19.4
	8	26.84	16.84	21.84
	9	24.73	18.8	21.765
	10	29.91	15.64	22.775
	11	20.87	14.68	17.775
	12	24.97	19.22	22.095
	13	24.88	15.85	20.365
	14	25.49	18.43	21.96
	15	26.89	16.54	21.715
p53A-B+, hidGFP +IR	1	38.86	15.34	27.1
	2	22.65	26.06	24.355
	3	41.23	17.06	29.145
	4	24.65	19.48	22.065
	5	29.87	20.09	24.98
	6	31.25	24.65	27.95
	7	24.67	14.68	19.675
	8	22.2	16.87	19.535
	9	30.09	15.5	22.795
	10	23.72	19	21.36
	11	35.26	22.38	28.82
	12	24.95	23.54	24.245
	13	29.85	19.65	24.75
	14	26.99	18.22	22.605
	15	29.12	21.87	25.495
p53A+B-, hidGFP -IR	1	12.34	21.05	16.695
	2	18.35	22.22	20.285
	3	13.89	13.66	13.775
	4	16.84	24.87	20.855
	5	13.88	20.07	16.975
	6	19.72	27.95	23.835
	7	14.65	18.51	16.58
	8	13.62	16.87	15.245
	9	16.08	20.15	18.115
	10	14.77	19.73	17.25
	11	12.84	19.84	16.34
	12	13.87	17.66	15.765
	13	14.86	17.2	16.03
	14	16.22	18.04	17.13
	15	15.62	16.93	16.275
p53A+B-, hidGFP +IR	1	27.96	39.03	33.495
	2	37.2	50.89	44.045
	3	28.29	34.2	31.245
	4	26.84	39.91	33.375
	5	22.15	42.81	32.48
	6	20.08	44.56	32.32
	7	31.54	38.11	34.825
	8	20.08	53.91	36.995
	9	24.46	47.55	36.005
	10	28.46	54.08	41.27
	11	22.65	42.98	32.815
	12	20.98	43.84	32.41
	13	29.24	38.14	33.69
	14	28.64	45.07	36.855
	15	25.71	40.95	33.33

## Sheet: Stats from Prism
Stats completed using PRISM
Number of families	3
Number of comparisons per family	28
Alpha	0.05
Tukey's multiple comparisons test	Mean Diff.	95.00% CI of diff.	Below threshold?	Summary	Adjusted P Value
Region 1
p53A+B+, hidGFP-IR vs. p53A+B+, hidGFP +IR	-21.04	-25.50 to -16.58	Yes	****	<0.0001	for example, this is comparing Region 1 of p53A+B+,hidGFP without IR to Region 1 of the same geno. +IR
p53A+B+, hidGFP-IR vs. p53A-B-, hidGFP -IR	4.001	-0.4615 to 8.464	No	ns	0.1088
p53A+B+, hidGFP-IR vs. p53A-B-, hidGFP +IR	5.365	0.9025 to 9.828	Yes	**	0.0088
p53A+B+, hidGFP-IR vs. p53A-B+, hidGFP -IR	-12.59	-17.05 to -8.124	Yes	****	<0.0001
p53A+B+, hidGFP-IR vs. p53A-B+, hidGFP +IR	-17.41	-21.87 to -12.95	Yes	****	<0.0001
p53A+B+, hidGFP-IR vs. p53A+B-, hidGFP -IR	-3.554	-8.017 to 0.9085	No	ns	0.2107
p53A+B+, hidGFP-IR vs. p53A+B-, hidGFP +IR	-14.67	-19.13 to -10.21	Yes	****	<0.0001
p53A+B+, hidGFP +IR vs. p53A-B-, hidGFP -IR	25.04	20.58 to 29.50	Yes	****	<0.0001
p53A+B+, hidGFP +IR vs. p53A-B-, hidGFP +IR	26.41	21.94 to 30.87	Yes	****	<0.0001
p53A+B+, hidGFP +IR vs. p53A-B+, hidGFP -IR	8.454	3.991 to 12.92	Yes	****	<0.0001
p53A+B+, hidGFP +IR vs. p53A-B+, hidGFP +IR	3.633	-0.8295 to 8.096	No	ns	0.1888
p53A+B+, hidGFP +IR vs. p53A+B-, hidGFP -IR	17.49	13.02 to 21.95	Yes	****	<0.0001
p53A+B+, hidGFP +IR vs. p53A+B-, hidGFP +IR	6.372	1.909 to 10.83	Yes	***	0.001
p53A-B-, hidGFP -IR vs. p53A-B-, hidGFP +IR	1.364	-3.099 to 5.827	No	ns	0.9768
p53A-B-, hidGFP -IR vs. p53A-B+, hidGFP -IR	-16.59	-21.05 to -12.13	Yes	****	<0.0001
p53A-B-, hidGFP -IR vs. p53A-B+, hidGFP +IR	-21.41	-25.87 to -16.95	Yes	****	<0.0001
p53A-B-, hidGFP -IR vs. p53A+B-, hidGFP -IR	-7.555	-12.02 to -3.092	Yes	****	<0.0001
p53A-B-, hidGFP -IR vs. p53A+B-, hidGFP +IR	-18.67	-23.13 to -14.21	Yes	****	<0.0001
p53A-B-, hidGFP +IR vs. p53A-B+, hidGFP -IR	-17.95	-22.41 to -13.49	Yes	****	<0.0001
p53A-B-, hidGFP +IR vs. p53A-B+, hidGFP +IR	-22.77	-27.24 to -18.31	Yes	****	<0.0001
p53A-B-, hidGFP +IR vs. p53A+B-, hidGFP -IR	-8.919	-13.38 to -4.456	Yes	****	<0.0001
p53A-B-, hidGFP +IR vs. p53A+B-, hidGFP +IR	-20.03	-24.50 to -15.57	Yes	****	<0.0001
p53A-B+, hidGFP -IR vs. p53A-B+, hidGFP +IR	-4.821	-9.284 to -0.3585	Yes	*	0.0258
p53A-B+, hidGFP -IR vs. p53A+B-, hidGFP -IR	9.033	4.570 to 13.50	Yes	****	<0.0001
p53A-B+, hidGFP -IR vs. p53A+B-, hidGFP +IR	-2.082	-6.545 to 2.381	No	ns	0.815
p53A-B+, hidGFP +IR vs. p53A+B-, hidGFP -IR	13.85	9.391 to 18.32	Yes	****	<0.0001
p53A-B+, hidGFP +IR vs. p53A+B-, hidGFP +IR	2.739	-1.724 to 7.202	No	ns	0.5285
p53A+B-, hidGFP -IR vs. p53A+B-, hidGFP +IR	-11.12	-15.58 to -6.652	Yes	****	<0.0001
Region 2
p53A+B+, hidGFP-IR vs. p53A+B+, hidGFP +IR	-15.59	-20.05 to -11.13	Yes	****	<0.0001
p53A+B+, hidGFP-IR vs. p53A-B-, hidGFP -IR	9.612	5.149 to 14.07	Yes	****	<0.0001
p53A+B+, hidGFP-IR vs. p53A-B-, hidGFP +IR	9.729	5.266 to 14.19	Yes	****	<0.0001
p53A+B+, hidGFP-IR vs. p53A-B+, hidGFP -IR	0.777	-3.686 to 5.240	No	ns	0.9993
p53A+B+, hidGFP-IR vs. p53A-B+, hidGFP +IR	-2.712	-7.175 to 1.751	No	ns	0.541
p53A+B+, hidGFP-IR vs. p53A+B-, hidGFP -IR	-2.736	-7.199 to 1.727	No	ns	0.5298
p53A+B+, hidGFP-IR vs. p53A+B-, hidGFP +IR	-26.82	-31.28 to -22.36	Yes	****	<0.0001
p53A+B+, hidGFP +IR vs. p53A-B-, hidGFP -IR	25.2	20.74 to 29.66	Yes	****	<0.0001
p53A+B+, hidGFP +IR vs. p53A-B-, hidGFP +IR	25.32	20.85 to 29.78	Yes	****	<0.0001
p53A+B+, hidGFP +IR vs. p53A-B+, hidGFP -IR	16.37	11.90 to 20.83	Yes	****	<0.0001
p53A+B+, hidGFP +IR vs. p53A-B+, hidGFP +IR	12.88	8.413 to 17.34	Yes	****	<0.0001
p53A+B+, hidGFP +IR vs. p53A+B-, hidGFP -IR	12.85	8.389 to 17.31	Yes	****	<0.0001
p53A+B+, hidGFP +IR vs. p53A+B-, hidGFP +IR	-11.23	-15.70 to -6.770	Yes	****	<0.0001
p53A-B-, hidGFP -IR vs. p53A-B-, hidGFP +IR	0.117	-4.346 to 4.580	No	ns	>0.9999
p53A-B-, hidGFP -IR vs. p53A-B+, hidGFP -IR	-8.835	-13.30 to -4.372	Yes	****	<0.0001
p53A-B-, hidGFP -IR vs. p53A-B+, hidGFP +IR	-12.32	-16.79 to -7.861	Yes	****	<0.0001
p53A-B-, hidGFP -IR vs. p53A+B-, hidGFP -IR	-12.35	-16.81 to -7.885	Yes	****	<0.0001
p53A-B-, hidGFP -IR vs. p53A+B-, hidGFP +IR	-36.43	-40.90 to -31.97	Yes	****	<0.0001
p53A-B-, hidGFP +IR vs. p53A-B+, hidGFP -IR	-8.952	-13.41 to -4.489	Yes	****	<0.0001
p53A-B-, hidGFP +IR vs. p53A-B+, hidGFP +IR	-12.44	-16.90 to -7.978	Yes	****	<0.0001
p53A-B-, hidGFP +IR vs. p53A+B-, hidGFP -IR	-12.47	-16.93 to -8.002	Yes	****	<0.0001
p53A-B-, hidGFP +IR vs. p53A+B-, hidGFP +IR	-36.55	-41.01 to -32.09	Yes	****	<0.0001
p53A-B+, hidGFP -IR vs. p53A-B+, hidGFP +IR	-3.489	-7.952 to 0.9735	No	ns	0.2299
p53A-B+, hidGFP -IR vs. p53A+B-, hidGFP -IR	-3.513	-7.976 to 0.9495	No	ns	0.2227
p53A-B+, hidGFP -IR vs. p53A+B-, hidGFP +IR	-27.6	-32.06 to -23.14	Yes	****	<0.0001
p53A-B+, hidGFP +IR vs. p53A+B-, hidGFP -IR	-0.024	-4.487 to 4.439	No	ns	>0.9999
p53A-B+, hidGFP +IR vs. p53A+B-, hidGFP +IR	-24.11	-28.57 to -19.65	Yes	****	<0.0001
p53A+B-, hidGFP -IR vs. p53A+B-, hidGFP +IR	-24.09	-28.55 to -19.62	Yes	****	<0.0001
Full germarium
p53A+B+, hidGFP-IR vs. p53A+B+, hidGFP +IR	-18.05	-23.76 to -12.35	Yes	***	0.0003
p53A+B+, hidGFP-IR vs. p53A-B-, hidGFP -IR	6.806	2.199 to 11.41	Yes	**	0.0081
p53A+B+, hidGFP-IR vs. p53A-B-, hidGFP +IR	7.547	2.667 to 12.43	Yes	**	0.0049
p53A+B+, hidGFP-IR vs. p53A-B+, hidGFP -IR	-5.905	-10.27 to -1.541	Yes	**	0.0082
p53A+B+, hidGFP-IR vs. p53A-B+, hidGFP +IR	-10.06	-20.15 to 0.03312	Yes	*	0.0252
p53A+B+, hidGFP-IR vs. p53A+B-, hidGFP -IR	-3.145	-8.270 to 1.980	No	ns	0.1296
p53A+B+, hidGFP-IR vs. p53A+B-, hidGFP +IR	-20.75	-28.32 to -13.17	Yes	**	0.0013
p53A+B+, hidGFP +IR vs. p53A-B-, hidGFP -IR	24.86	14.47 to 35.25	Yes	**	0.0044
p53A+B+, hidGFP +IR vs. p53A-B-, hidGFP +IR	25.6	19.70 to 31.50	Yes	****	<0.0001
p53A+B+, hidGFP +IR vs. p53A-B+, hidGFP -IR	12.15	5.132 to 19.17	Yes	**	0.0051
p53A+B+, hidGFP +IR vs. p53A-B+, hidGFP +IR	7.994	-2.955 to 18.94	No	ns	0.0601
p53A+B+, hidGFP +IR vs. p53A+B-, hidGFP -IR	14.91	8.805 to 21.01	Yes	***	0.0008
p53A+B+, hidGFP +IR vs. p53A+B-, hidGFP +IR	-2.691	-9.476 to 4.094	No	ns	0.409
p53A-B-, hidGFP -IR vs. p53A-B-, hidGFP +IR	0.741	-4.257 to 5.739	No	ns	0.9431
p53A-B-, hidGFP -IR vs. p53A-B+, hidGFP -IR	-12.71	-16.86 to -8.567	Yes	***	0.0009
p53A-B-, hidGFP -IR vs. p53A-B+, hidGFP +IR	-16.87	-32.42 to -1.316	Yes	*	0.0213
p53A-B-, hidGFP -IR vs. p53A+B-, hidGFP -IR	-9.951	-15.34 to -4.565	Yes	**	0.0042
p53A-B-, hidGFP -IR vs. p53A+B-, hidGFP +IR	-27.55	-38.48 to -16.62	Yes	**	0.004
p53A-B-, hidGFP +IR vs. p53A-B+, hidGFP -IR	-13.45	-18.07 to -8.833	Yes	***	0.0004
p53A-B-, hidGFP +IR vs. p53A-B+, hidGFP +IR	-17.61	-27.88 to -7.330	Yes	**	0.0052
p53A-B-, hidGFP +IR vs. p53A+B-, hidGFP -IR	-10.69	-16.04 to -5.348	Yes	**	0.0018
p53A-B-, hidGFP +IR vs. p53A+B-, hidGFP +IR	-28.29	-34.40 to -22.18	Yes	****	<0.0001
p53A-B+, hidGFP -IR vs. p53A-B+, hidGFP +IR	-4.155	-14.05 to 5.735	No	ns	0.2411
p53A-B+, hidGFP -IR vs. p53A+B-, hidGFP -IR	2.76	-2.118 to 7.638	No	ns	0.1651
p53A-B+, hidGFP -IR vs. p53A+B-, hidGFP +IR	-14.84	-22.15 to -7.535	Yes	**	0.0032
p53A-B+, hidGFP +IR vs. p53A+B-, hidGFP -IR	6.915	-3.556 to 17.39	No	ns	0.0787
p53A-B+, hidGFP +IR vs. p53A+B-, hidGFP +IR	-10.69	-19.38 to -1.986	Yes	*	0.0117
p53A+B-, hidGFP -IR vs. p53A+B-, hidGFP +IR	-17.6	-23.91 to -11.29	Yes	***	0.0005
