# Supplementary material for: Drosophila p53 isoforms have overlapping and distinct functions in germline genome integrity and oocyte quality control
Source: eLife. 2022 Jan 13;11:e61389. doi: 10.7554/eLife.61389 (PMC8758136; doi:10.7554/eLife.61389)
Supplement: Figure 5—source data 1. [file elife-61389-fig5-data1.xlsx]

## Sheet: Region1
				Fluroscence intensity		Ratio	mean	STDDEV		A	B	B/A
	region1	1	B	183.61		1.12115	1.07954	0.0991252		163.77	183.61	1.12115
			A	163.77						149.47	151.02	1.01037
										144.006	168.88	1.17273
		2	B	151.02		1.01037				173.619	200.122	1.15265
			A	149.47						187.99	219.93	1.1699
										187.009	166.54	0.890545
		3	B	168.88		1.17273				171	190.09	1.11164
			A	144.006						189.043	177.09	0.936771
										179.443	198.8	1.10787
		4	B	200.122		1.15265				170.26	191	1.12181
			A	173.619					MEAN	171.561	184.708	1.07954
		5	B	219.93		1.1699			Mean	171.561	184.708	1.07954
			A	187.99					SD	15.601	19.7767	0.0991252
									SEM	4.93348	6.25393	0.0313461
		6	B	166.54		0.890545			N	10	10	10
			A	187.009					90% CI	162.51737 to 180.60463	173.24404 to 196.17236	1.02208273579 to 1.13700478181
									95% CI	160.40069 to 182.72131	170.56084 to 198.85556	1.00863386926 to 1.15045364834
		7	B	190.09		1.11164			99% CI	155.52800 to 187.59400	164.38398 to 205.03242	0.97767400458 to 1.18141351302
			A	171					Minimum	144.006	151.02	0.890545
									Median	172.31	186.85	1.11639
		8	B	177.09		0.936771			Maximum	189.043	219.93	1.17273
			A	189.043
		9	B	198.8		1.10787
			A	179.443
		10	B	191		1.12181
			A	170.26

## Sheet: Region 2
				Fluroscence intensity		Ratio	mean	STDEV		A	B	B/A
	region2	1	B	12.5		0.135756	0.590594	0.70322		92.077	12.5	0.135756
			A	92.077						112.39	24.06	0.214076
										39.32	24.38	0.620041
		2	B	24.06		0.214076				117.98	23.92	0.202746
			A	112.39						109.43	19.887	0.181733
										125.98	27.93	0.221702
		3	B	24.38		0.620041				109	31.6	0.289908
			A	39.32						130.08	27.08	0.20818
										111	39.97	0.36009
		4	B	23.92		0.202746				121	87	0.719008
			A	117.98						131.37	27.992	0.213078
										75.98	22	0.28955
		5	B	19.887		0.181733				110.98	97	0.874031
			A	109.43						87.98	112.98	1.28416
										111.98	124.86	1.11502
		6	B	27.93		0.221702				100	27	0.27
			A	125.98						15	35	2.33333
										13.2	40	3.0303
		7	B	31.6		0.289908				172	76	0.44186
			A	109						112.98	22	0.194725
										198.22	52	0.262335
		8	B	27.08		0.20818				121.24	24	0.197954
			A	130.08						101.04	42	0.415677
										182	72	0.395604
		9	B	39.97		0.36009				121.775	35.8	0.293985
			A	111					mean	108.96	45.1584	0.590594
		10	B	87		0.719008			Mean	108.96	45.1584	0.590594
			A	121					SD	42.7712	31.1906	0.70322
									SEM	8.55425	6.23812	0.140644
		11	B	27.992		0.213078			N	25	25	25
			A	131.37					90% CI	94.32478 to 123.59538	34.48567 to 55.83105	0.34996884010 to 0.83121926542
									95% CI	91.30498 to 126.61518	32.28351 to 58.03321	0.30031907643 to 0.88086902909
		12	B	22		0.28955			99% CI	85.03435 to 132.88581	27.71070 to 62.60602	0.19722106426 to 0.98396704126
			A	75.98					Minimum	13.2	12.5	0.135756
									Median	111.98	31.6	0.289908
		13	B	97		0.874031			Maximum	198.22	124.86	3.0303
			A	110.98
		14	B	112.98		1.28416
			A	87.98
		15	B	124.86		1.11502
			A	111.98
		16	B	27		0.27
			A	100
		17	B	35		2.33333
			A	15
		18	B	40		3.0303
			A	13.2
		19	B	76		0.44186
			A	172
		20	B	22		0.194725
			A	112.98
		21	B	52		0.262335
			A	198.22
		22	B	24		0.197954
			A	121.24
		23	B	42		0.415677
			A	101.04
		24	B	72		0.395604
			A	182
		25	B	35.8		0.293985
			A	121.775

## Sheet: Region 3
				Fluroscence intensity			Ratio	mean	STDEV	A	B	A/B
	region3	1	B	112.63			1.12503	1.23651	0.537863	100.113	112.63	1.12503
			A	100.113						192.89	187.99	0.974597
										60.91	162.96	2.67542
		2	B	187.99			0.974597			98.91	114.57	1.15833
			A	192.89						158	210	1.32911
										151	206	1.36424
		3	B	162.96			2.67542			193	171.003	0.886026
			A	60.91						110	121.04	1.10036
										184.4	179.92	0.975705
		4	B	114.57			1.15833			152	118	0.776316
			A	98.91					mean	140.122	158.411	1.23651
		5	B	210			1.32911		Mean	140.122	158.411	1.23651
			A	158					SD	45.462	38.7162	0.537863
									SEM	14.3764	12.2431	0.170087
		6	B	206			1.36424		N	10	10	10
			A	151					90% CI	113.76882 to 166.47578	135.96822 to 180.85438	0.92472436344 to 1.54830299676
									95% CI	107.60073 to 172.64387	130.71538 to 186.10722	0.85174945480 to 1.62127790540
		7	B	171.003			0.886026		99% CI	93.40154 to 186.84306	118.62310 to 198.19950	0.68375810086 to 1.78926925934
			A	193					Minimum	60.91	112.63	0.776316
									Median	151.5	166.982	1.1127
		8	B	121.04			1.10036		Maximum	193	210	2.67542
			A	110
		9	B	179.92			0.975705
			A	184.4
		10	B	118			0.776316
			A	152			1.23651

## Sheet: Region 2 selected
				Fluroscence intensity		Ratio	mean	STDEV		A	B	B/A
	region2	1	B	12.5		0.135756				92.077	12.5	0.135756
			A	92.077						112.39	24.06	0.214076
										39.32	24.38	0.620041
		2	B	24.06		0.214076				117.98	23.92	0.202746
			A	112.39						109.43	19.887	0.181733
										125.98	27.93	0.221702
		3	B	24.38		0.620041				109	31.6	0.289908
			A	39.32						130.08	27.08	0.20818
										111	39.97	0.36009
		4	B	23.92		0.202746				121	87	0.719008
			A	117.98						131.37	27.992	0.213078
										75.98	22	0.28955
		5	B	19.887		0.181733				110.98	97	0.874031
			A	109.43						87.98	112.98	1.28416
										111.98	124.86	1.11502
		6	B	27.93		0.221702				100	27	0.27
			A	125.98
		7	B	31.6		0.289908				172	76	0.44186
			A	109						112.98	22	0.194725
										198.22	52	0.262335
		8	B	27.08		0.20818				121.24	24	0.197954
			A	130.08						101.04	42	0.415677
										182	72	0.395604
		9	B	39.97		0.36009				121.775	35.8	0.293985
			A	111					mean	117.209	45.8243	0.408748
		10	B	87		0.719008			Mean	117.209	45.8243	0.408748
			A	121					SD	33.2632	32.4797	0.31032
									SEM	6.93585	6.77249	0.0647061
		11	B	27.992		0.213078			N	23	23	23
			A	131.37					90% CI	105.29893 to 129.11864	34.19497 to 57.45364	0.29763873704 to 0.51985821565
									95% CI	102.82471 to 131.59286	31.77902 to 59.86958	0.27455618007 to 0.54294077262
		12	B	22		0.28955			99% CI	97.65832 to 136.75925	26.73432 to 64.91429	0.22635777099 to 0.59113918171
			A	75.98					Minimum	39.32	12.5	0.135756
									Median	112.39	27.992	0.28955
		13	B	97		0.874031			Maximum	198.22	124.86	1.28416
			A	110.98
		14	B	112.98		1.28416
			A	87.98
		15	B	124.86		1.11502
			A	111.98
		16	B	27		0.27
			A	100
		19	B	76		0.44186
			A	172
		20	B	22		0.194725
			A	112.98
		21	B	52		0.262335
			A	198.22
		22	B	24		0.197954
			A	121.24
		23	B	42		0.415677
			A	101.04
		24	B	72		0.395604
			A	182
		25	B	35.8		0.293985
			A	121.775

## Sheet: summary
	Summary
	Region1			Region2			Region 3
	A	B	B/A	A	B	B/A	A	B	B/A
Mean	171.561	184.708	1.07954	117.209	45.8243	0.408748	140.122	158.411	1.23651
SD	15.601	19.7767	0.0991252	33.2632	32.4797	0.31032	45.462	38.7162	0.537863
SEM	4.93348	6.25393	0.0313461	6.93585	6.77249	0.0647061	14.3764	12.2431	0.170087
N	10	10	10	23	23	23	10	10	10
90% CI	162.51737 to 180.60463	173.24404 to 196.17236	1.02208273579 to 1.13700478181	105.29893 to 129.11864	34.19497 to 57.45364	0.29763873704 to 0.51985821565	113.76882 to 166.47578	135.96822 to 180.85438	0.92472436344 to 1.54830299676
95% CI	160.40069 to 182.72131	170.56084 to 198.85556	1.00863386926 to 1.15045364834	102.82471 to 131.59286	31.77902 to 59.86958	0.27455618007 to 0.54294077262	107.60073 to 172.64387	130.71538 to 186.10722	0.85174945480 to 1.62127790540
99% CI	155.52800 to 187.59400	164.38398 to 205.03242	0.97767400458 to 1.18141351302	97.65832 to 136.75925	26.73432 to 64.91429	0.22635777099 to 0.59113918171	93.40154 to 186.84306	118.62310 to 198.19950	0.68375810086 to 1.78926925934
Minimum	144.006	151.02	0.890545	39.32	12.5	0.135756	60.91	112.63	0.776316
Median	172.31	186.85	1.11639	112.39	27.992	0.28955	151.5	166.982	1.1127
Maximum	189.043	219.93	1.17273	198.22	124.86	1.28416	193	210	2.67542
Region vs Region 2				Region 2 vs Region 3			Region 1 vs Region 3
P value and statistical significance:				P value and statistical significance:			P value and statistical significance:
The two-tailed P value is less than 0.0001				The two-tailed P value is less than 0.0001			The two-tailed P value equals 0.3691
By conventional criteria, this difference is considered to be extremely statistically significant.				By conventional criteria, this difference is considered to be extremely statistically significant.			By conventional criteria, this difference is considered to be not statistically significant.
Confidence interval:				Confidence interval:			Confidence interval:
The mean of Group One minus Group Two equals 0.6700				The mean of Group One minus Group Two equals 0.8300			The mean of Group One minus Group Two equals 0.1600
95% confidence interval of this difference: From 0.4640 to 0.8760				95% confidence interval of this difference: From 0.5280 to 1.1320			95% confidence interval of this difference: From -0.2049 to 0.5249
Intermediate values used in calculations:				Intermediate values used in calculations:			Intermediate values used in calculations:
t = 6.6334				t = 5.6046			t = 0.9213
df = 31				df = 31			df = 18
standard error of difference = 0.101				standard error of difference = 0.148			standard error of difference = 0.174
