# Supplementary material for: Drosophila p53 isoforms have overlapping and distinct functions in germline genome integrity and oocyte quality control
Source: eLife. 2022 Jan 13;11:e61389. doi: 10.7554/eLife.61389 (PMC8758136; doi:10.7554/eLife.61389)
Supplement: Figure 6—figure supplement 1—source data 1. [file elife-61389-fig6-figsupp1-data1.xlsx]

## Sheet: Sheet1
20 ovarioles counted for each genotype			red in nurse cells = more than apparent backgroud/ significant damage
GENOTYPE	WT	p53Null	p53Acrispr	p53Bcrispr	okra	okra; p53Null	okra; p53Acrispr	okra;p53Bcrispr
# S1 with red oocyte	1	9	8	19		18	20	20
% S1 with red oocyte	5	45	40	95		90	100	100
# S1 with red oocyte sister	0	5	2	5		16	5	7
% S1 with red oocyte sister	0	25	10	25		80	25	35
# S1 with red in nurse cells	1	8	4	18		14	6	17
% S1 with red in nurse cells	5	40	20	90		70	30	85
