# Supplementary material for: Drosophila p53 isoforms have overlapping and distinct functions in germline genome integrity and oocyte quality control
Source: eLife. 2022 Jan 13;11:e61389. doi: 10.7554/eLife.61389 (PMC8758136; doi:10.7554/eLife.61389)
Supplement: Figure 6—figure supplement 2—source data 1. [file elife-61389-fig6-figsupp2-data1.xlsx]

## Sheet: raw data
	WT	p53Null	p53A	p53B	Okr	Okr; p53Null	Okr; p53A	Okr; p53B		all values represent mean fluorescence of cell nucleus (unit = grays) measured on single z stack slice using LAS X software
oocytes	19.2	112.13	32.66	58.78	73.19	129.61	107.07	140.55		5 random ovarioles total were analyzed for each genotype
	14.16	146.72	37.99	68.55	87.24	139.62	96.81	126.27
	26.03	90.89	67.82	92.17	117.69	146.91	128.91	139.91
	20.51	101.82	64.16	70.36	120.13	130.21	150.08	108.74
	15.92	92.34	40.27	66.41	98.23	103.49	107.64	118.37
nurse cells	19.21	80.92	19.37	15.61	38.36	61.34	11.83	62.24
	19.98	51.52	21.49	34.78	39.53	39.04	12.61	71.24
	31.16	62.16	17.8	29.16	25.05	57.47	14.68	49.82
	22.89	81.86	20.77	46.12	39.93	51.83	11.64	89.92
	16.28	47.21	14.95	37.02	36.21	43.1	15.54	87.33
	19.77	23.14	25	54.41	25.05	52.81	15.02	76.78
	14.89	26.88	28.46	50.2	37.21	23.24	40.21	68.12
	23.39	49.72	31.82	47.82	38.84	41.69	21.31	30.14
	17.22	26.47	15.17	53.91	37.57	37.17	23.75	52.16
	10.96	28.58	49.21	50.87	28.12	42.71	17.33	20.87
	20.1	92.17	30.86	46.21	24.39	38.8	16.24	53.39
	14.97	59.59	33.57	43.65	26.67	30.8	16.84	56.07
	19.82	21.59	58.22	39.8	41.89	37.85	24.72	66.62
	32.77	31.42	21.26	52.21	39.26	26.42	15.67	68.81
	18.48	29.74	27.73	26.3	29.68	29.05	20.65	53.09
	19.16	47.93	11.47	26.31	67.6	44.17	30.08	47.73
	20.83	49.42	18.51	35.59	24.6	32.35	32.02	41.84
	17.87	48.12	17.62	23.91	15.7	40.37	25.12	38.68
	17.74	38.13	28.65	33.46	30.59	58.19	20.19	32.89
	21.34	47.84	38.67	42.69	29.62	47.23	16.43	26.25
	19.62	50.12	19.85	29.16	29.68	40.54	24.33	47.84
	21.1	52.64	20.49	31.46	32.02	27.87	31.15	19.08
	19.83	61.87	17.59	34.26	27.55	33.03	26.02	27.33
	19.47	40.22	12.98	25.34	40.11	31.08	21.77	33.71
	26.59	59.59	14.37	29.25	46.54	25.63	19.68	38.47
	19.87	45.8	21.43	37.73	81.72	67.53	21.84	50.02
	22.65	35.95	17.89	38.47	29.87	47.77	24.92	42.79
	17.23	34.43	16.55	20.16	35.29	18.14	17.8	47.42
	19.99	49.45	12.72	30.12	31.71	21.69	28.21	52.94
	17.58	39.9	19.79	54.39	32.46	30.54	13.2	87.21
	18.67	35.69	33.63	40	13.4	29.18	16.42	89.04
	13.02	35.59	42.81	51.38	29.4	29.98	19.25	76.52
	17.92	32.48	45.17	54.18	39.35	37.92	18.11	50.35
	11.83	32.96	46.13	43.83	22.85	34.48	17.82	46.22
	13.71	40.38	33.47	50.41	39.42	30.12	23.7	80.05
	20.96	37.94	24.91	33.46	26.72	42.97	15.14	70.01
	18.82	35.5	21.3	40.82	18.86	73.03	13.81	74.23
	14.66	25.05	27.78	36.83	20.24	43.86	10.99	62.27
	15.93	34.72	31.83	51.45	19.83	38.22	12.63	54.49
	28.34	41.61	42.13	48.95	28.32	32.92	7.99	48.42
	21.96	36.67	24.91	35.56	25.85	39.71	9.73	46.42
	18.82	30.17	19.48	33.21	43.52	32	12.97	53.73
	17.09	27.83	28.58	24.48	27.53	27.77	14.11	49.11
	20.86	21.97	27.75	29.19	48.11	20.91	10.96	40.8
	14.29	31.22	25.72	41.46	29.81	30.83	18.92	32.64
	11.7	26.89	31.08	37.32	26.82	24.99	22.24	96.21
	10.58	22.34	19.17	41.88	26.79	37.02	14.07	51.17
	15.39	32.63	33.06	50.24	29.91	41.17	13.65	56.04
	20.64	37.55	21.73	32.23	32.06	30.93	20.23	67.93
	18.92	36.65	34.24	52.48	16.84	43.26	19.87	62.77
	12.48	19.6	22.08	43.27	47.66	22.08	17.34	53.61
	14.77	37.21	40.94	46.11	23.67	14.67	14.21	74.34
	11.39	26.17	22.21	26.43	23.17	16.92	8.91	53.93
	15.56	22.3	25.97	31.87	34.56	15.84	10.04	60.01
	17.19	24.55	18.08	39.92	43.08	49.96	11.86	48.5
	13.36	21.98	15.64	52.66	26.87	27.38	21.73	92.28
	14.88	29.73	12.17	47.82	36.49	35.88	17.4	58.83
	20.93	31.82	19.26	27.96	15.37	22.02	18.33	54.51
	19.26	13.77	12.2	22.92	14.25	20.76	12.18	64.54
	14.24	16.98	14.27	37.56	17.98	14.05	24.89	38.11
	7.39	51.69	40.37	31.73	20.01	26.16	22.14	32.92
	9.87	20.74	24.8	28.84	19.88	34.99	18.84	52.27
	6.54	23.82	20.45	43.91	23.79	27.4	16.64	49.16
	6.12	26.99	12.39	34.9	29.35	23.89	23.31	46.57
	8.3	20.36	16.88	42.41	28.73	17.2	19.04	30.16
	9.41	31.09	15.43	38.71	17.12	19.96	13.01	41.7
	7.31	18.76	16.23	42.45	18.76	24.56	11.69	33.65
	9.15	22.3	14.14	31.38	22.93	22.16	14.42	35.44
	10.86	19.27	19.21	40.22	49.42	22.82	12.82	51.91
	9.92	38.97	23.17	37.24	21.69	30.25	11.63	17.71
	22.65	35.37	18.89	52.34	41.79	28.87	21.71	24.77
	17.81	32.56	15.38	47.84	32.32	33.03	18.91	20.92
	16.22	22.52	11.62	32.12	32.67	36.72	16.41	17.66
	18.57	20.94	20.75	22.16	89.91	28.81	13.72	29.76
	11.2	42.82	17.14	24.91	36.01	32.84	17.93	26.83

## Sheet: p values
		p53 and okra single and double mutant H2AV fluorescence quantification - p value summary table
		all values represent mean fluorescence of cell nucleus (unit = grays) measured on single z stack slice using LAS X software
		5 random ovarioles total were analyzed for each genotype
		two-way ANOVAs were performed with pairwise adjusted p values computed through a Tukey test using GraphPad Prism (version 9.1.2)
				^I copied the wording used in a Rotelli paper figure description
		WILD TYPE vs OTHERS
		p53 A+B+ vs p53 A-B-	p53 A+B+ vs p53 A-B+	p53 A+B+ vs p53 A+B-	p53 A+B+ vs okr-; p53 A+B+	p53 A+B+ vs okr-; p53 A-B-	p53 A+B+ vs okr-; p53A-B+	p53 A+B+ vs okr-; p53 A+B-
OOCYTE	adjusted p value	<0.0001	0.0047	<0.0001	<0.0001	<0.0001	<0.0001	<0.0001
n=5	rank on plot	****	**	****	****	****	****	****
NURSE CELLS	adjusted p value	<0.0001	0.0104	<0.0001	<0.0001	<0.0001	9995	<0.0001
n=75	rank on plot	****	*	****	****	****	ns	****
		SINGLE vs DOUBLE MUTANTS
		p53 A+B+ vs okr-; p53 A+B+	p53 A-B- vs okr-; p53 A-B-	p53 A-B+ vs okr-; p53 A-B+	p53 A+B- vs okr-; p53 A+B-
OOCYTE	adjusted p value	<0.0001	0.1239	<0.0001	<0.0001
n=5	rank on plot	****	ns	****	****
NURSE CELLS	adjusted p value	<0.0001	0.9102	0.555	<0.0001
n=75	rank on plot	****	ns	ns	****
		OKRA vs DOUBLE MUTANTS
		okr-; p53 A+B+ vs okr-; p53 A-B-	okr-; p53 A+B+ vs okr-; p53 A-B+	okr-; p53 A+B+ vs okr-; p53 A+B-
OOCYTE	adjusted p value	0.0026	0.1334	0.009
n=5	rank on plot	**	ns	**
NURSE CELLS	adjusted p value	0.795	<0.0001	<0.0001
n=75	rank on plot	ns	****	****
