# Supplementary material for: Drosophila p53 isoforms have overlapping and distinct functions in germline genome integrity and oocyte quality control
Source: eLife. 2022 Jan 13;11:e61389. doi: 10.7554/eLife.61389 (PMC8758136; doi:10.7554/eLife.61389)
Supplement: Figure 6—source data 1. [file elife-61389-fig6-data1.xlsx]

## Sheet: Sheet1
Strain		Replicate		Ovariole		Stage 1 NC		Stage 1 O		Stage 2 NC		Stage 2 O		Stage 3 NC		Stage 3 O		Stage 4 NC		Stage 4 O		Stage 5 NC		Stage 5 O		Stage 6 NC		Stage 6 O
okraAA/RU		1		1		-		x
				2		-		x		-		x
				3		-		-
				4		-		x		-		x
				5		-		x		-		x
				6		-		x		-		x		-		x
				7		-		x		-		x		-		x
				8		-		x				x				x
				9				x				x				x
				10		x		x				x
				11		x		x				x
				12				x				x				x
				13				x				x
				14				x				x				x
				15		x		x				x
		2		1		x		xx		x		xx				x
				2		x		xx		x		xx
				3		x		xx		x		xx				x
				4		x		xx		x		xx		x		xx
				5		x		xx		x		xx		x		xx
				6		x		xx		x		xx				x
				7		x		xx		x		xx
				8		x		xx		x		xx				x
				9				x				x				x
				10		x		xx				x
		3		1		x		xx				x
				2		x		xx		x		xx
				3				x				x
				4				x				x				x
				5		x		x		x		x				x
				6		x		xx		x		xx
				7		x		x
				8		x		xx
				9				x				x
				10						x		xx		x		xx

## Sheet: Sheet2
Strain		Replicate		Ovariole		Stage 1 NC		Stage 1 O		Stage 2 NC		Stage 2 O		Stage 3 NC		Stage 3 O		Stage 4 NC		Stage 4 O		Stage 5 NC		stage 5 O		Stage6 NC		stage6 O
																				x				x				x
okraaa/ru;acrispr		1		1				x				x				x				x				x				x
				2				x				x				x				x				x				x
				3				x				x				x				x				x				x
				4				x				x				x				x				x				x
				5				x				x				x				x				x				x
				6				x				x				x				x				x				x
				7				x				x				x				x				x				x
				8				x				x				x				x				x				x
				9				x				x				x				x				x				x
				10				x				x
																				x				x				x
		2		1				x				x				x				x				x				x
				2				x				x				x				x				x				x
				3				x				x				x				x				x				x
				4				x				x				x				x				x				x
				5				x				x				x				x				x				x
				6				x				x				x				x				x				x
				7				x				x				x				x				x				x
				8				x				x				x				x				x				x
				9				x				x				x				x				x				x
				10				x				x				x
okraaa/ru;bcrispr		1		1		xxx		xxx		xxx		xxx		xxx		xxx		xxx		xx		x		xx				x
				2		xxx		xxx		xxx		xxx		xxx		xxx		xxx		xxx		xxx		xxx		xxx		xxx
				3		xxx		xxx		xxx		xxx		xxx		xxx		xxx		xxx		xxx		xxx		xxx		xxx
				4		xxx		xxx		xxx		xxx		xxx		xxx		xxx		xxx		xxx		xxx		xxx		xxx
				5		xxx		xxx		xxx		xxx		xxx		xxx		x		xxx		x		xxx		xxx		xxx
				6		x		xxx		xxx		xxx		xxx		xxx		x		x		x		xxx		xxx		x
				7		xxx		xxx		xxx		xxx		xxx		xxx		xxx		xxx		xxx		xxx		xxx		xxx
				8		xxx		xxx		xxx		xxx		xxx		xxx		xxx		xxx				xx
				9		xxx		xxx		xxx		xxx		xxx		xxx		xxx		xxx		xxx		xxx		xxx		xxx
				10		xxx		xxx		xxx		xxx		xxx		xxx		xxx		xxx		xxx		xxx		xxx		xxx
		2		1		xxx		xxx		xxx		xxx		xxx		xxx		xxx		xx		x		xx
				2		xxx		xxx		xxx		xxx		xxx		xxx		xxx		xxx		xxx		xxx				xxx
				3		xxx		xxx		xxx		xxx		xxx		xxx		xxx		xxx				xxx		xxx		xxx
				4		xxx		xxx		xxx		xxx		xxx		xxx		xxx		xxx		xxx		xxx		xxx		xxx
				5		xxx		xxx		xxx		xxx		xxx		xxx		x		xxx		x		xxx		xxx		xxx
				6		x		xxx		xxx		xxx		xxx		xxx		x		x		x		xxx		xxx		x
				7		xxx		xxx		xxx		xxx		xxx		xxx		xxx		xxx		xxx		xxx		xxx		xxx
				8		xxx		xxx		xxx		xxx		xxx		xxx		xxx		xxx				xx
				9		xxx		xxx		xxx		xxx		xxx		xxx		xxx		xxx		xxx		xxx
				10		xxx		xxx		xxx		xxx		xxx		xxx		xxx		xxx		xxx		xxx		xxx		xxx

## Sheet: Sheet3
Strain		Replicate		Ovariole		Stage 1 NC		Stage 1 O		Stage 2 NC		Stage 2 O		Stage 3 NC		Stage 3 O		Stage 4 NC		Stage 4 O		Stage 5 NC		stage 5 O		Stage6 NC		stage6 O
acrisp		1		1				x
				2
				3
				4
				5
				6		x		xx
				7
				8
				9
				10		x		x
		2		1
				2
				3
				4
				5				x
				6				x
				7
				8
				9
				10
bcrispr		1		1				x
				2		x		x
				3		x		x
				4		x		x		x		x
				5		x		x
				6		x		x
				7				x
				8				x				x
				9		x		x
				10		x		x
		2		1		x		x
				2		x		x
				3		x		xx
				4		x		x
				5		x		x
				6				x		x		x
				7
				8		x		xxx
				9		x		x
				10		x		x

## Sheet: Sheet4
		Replicate		stage 1 NC	stage 1 O	stage2 NC	stage 2 O	stage 3 Nc	stage 3 O	stage 4 NC	stage 4 O	stage5 NC	stage 5 O	stage 6 NC	stage 6 O
okraaa/ru		1		3	14 of 15		13		6
		2		9 of 10	10	8	10	2	7
		3		6	9 of 10	4	8	3	3
	in percentage. 1			20	93.3		86.6		40
		2		90	100	80	100	20	70
		3		60	90	40	80	30	30
		Average		56.6	94.4	40	88.8	16.6	46.6
				stage 1 NC	stage 1 O	stage2 NC	stage 2 O	stage 3 Nc	stage 3 O
		g-H2Av +ve (%)		56.6	94.4	40	88.8	16.6	46.6
okraaa/ru;acrispr		Replicate		stage 1 NC	stage 1 O	stage2 NC	stage 2 O	stage 3 Nc	stage 3 O	stage 4 NC	stage 4 O	stage5 NC	stage 5 O	stage 6 NC	stage 6 O
		1			10 of 10		10		9		10		10		10
		2			10 of 10		10		10		8		10		10
	in percentage. 1				100		100		90		100		100		100
		2			100		100		100		80		100		100
		average			100		100		95		90		100		100
				stage 1 NC	stage 1 O	stage2 NC	stage 2 O	stage 3 Nc	stage 3 O	stage 4 NC	stage 4 O	stage5 NC	stage 5 O	stage 6 NC	stage 6 O
		g-H2Av +ve (%)			100		100		95		90		100		100

## Sheet: Sheet5
okraaa/ru;bcrispr		Replicate		stage 1 NC	stage 1 O	stage2 NC	stage 2 O	stage 3 Nc	stage 3 O	stage 4 NC	stage 4 O	stage5 NC	stage 5 O	stage 6 NC	stage 6 O
		1		10 of 10	10	10	10	10	10	10	10	9	10	9	9
		2		10 of 10	10	10	10	10	10	10	10	8	10	6	6
				stage 1 NC	stage 1 O	stage2 NC	stage 2 O	stage 3 Nc	stage 3 O	stage 4 NC	stage 4 O	stage5 NC	stage 5 O	stage 6 NC	stage 6 O
		g-H2Av +ve (%)		100	100	100	100	100	100	100	100	85	100	75	75
acrispr		Replicate		stage 1 NC	stage 1 O	stage2 NC	stage 2 O	stage 3 Nc	stage 3 O	stage 4 NC	stage 4 O	stage5 NC	stage 5 O	stage 6 NC	stage 6 O
		1		2of 10	3
		2			2 of 10
				stage 1 NC	stage 1 O	stage2 NC	stage 2 O	stage 3 Nc	stage 3 O	stage 4 NC	stage 4 O	stage5 NC	stage 5 O	stage 6 NC	stage 6 O
		g-H2Av +ve (%)		10	25	0	0	0	0
bcrispr		Replicate		stage 1 NC	stage 1 O	stage2 NC	stage 2 O	stage 3 Nc	stage 3 O	stage 4 NC	stage 4 O	stage5 NC	stage 5 O	stage 6 NC	stage 6 O
		1		7	9	1	2
		2		8	9	1	1
		g-H2Av +ve (%)		stage 1 NC	stage 1 O	stage2 NC	stage 2 O	stage 3 Nc	stage 3 O	stage 4 NC	stage 4 O	stage5 NC	stage 5 O	stage 6 NC	stage 6 O
				75	90	10	15

## Sheet: Sheet6
Legend
	okraaa/ru
	A-
	B-
	okra-A-
	okra-B-
	A-B-
	okra-A-B-
		p53null		Ovariole

## Sheet: Sheet7
			p53null		Ovariole		Stage 1 NC		Stage 1 O		Stage 2 NC		Stage 2 O		Stage 3 NC		Stage 3 O		Stage 4 NC		Stage 4 O		Stage 5 NC		Stage 5 O		Stage 6 NC		Stage 6 O
	p53null okra-		1		1		x		x		x		x
					2		-		-		x		x		x		x		-		x
					3		x		x		x		x		x		x
					4		x		x		x		x
					5		-		x		x		x		x		x								x
					6		x		x		x		x		x		x
					7		x		x		x		x		x		x		x		x				x
					8		-		x		x		x		x		x
					9		-		-		x		x		x		x
					10		x		x		x		x		x		x		cannot identify this stage						x				x
					11		x		x		x		x		x		x		x		x				x
			2		1		x		x		x		x		x		x		x		x		x		x
					2		-		-		x		x		x		x		x		x				x
					3		-		-		x		x		x		x
					4		-		-		x		x		x		x
					5		-		-		x		x		x		x
					6		-		-		x		x		x		x
					7		x		x		x		x		x		x		x		x		x		xxx		x		xxx
					8				x		x		x		x		x		-		-				x
					9		-		x		x		x		x		x								x
					10		x		x		x		x		x		x
					11		x		x		x		x		-		x
					12		x		x		x		x		x		x
					13		x		x		x		x		x		x		x		x				x
					14		-		x		x		x		x		x		-		x
					15		-		-		x		x		x		x
					16		x		x		x		x		x		x
					17		x		x		x		x		x		x				x				x
					18		x		x		x		x				x
					19		-		-		x		x		x		x
					20		-		-		x		x		x		x		x		x		x		x
					21		x		x		x		x		x		x
				3	1		-		-		x		x		x		x
					2		-		-		x		x		x		x				x
					3		x		x		x		x		x		x
					4		x		x		-		x		-		x
					5		-		-		x		x		x		x		x		x
					6		x		x		-		x		x		x
					7		x		x		x		x		-		x
					8		x		x		x		x		x		x
					9		x		x		x		x		x		x
					10		-		-		x		x		x		x		x		x
					11		-		-		x		x		x		x
					12		-		-		x		x		x		x
					13		x		x		x		x		-		x
					14		x		x		x		x		x		x				x
					15		-		-		x		x		x		x		x		x		-		x
	p53null			1	1		-		-
					2		-		-
					3		x		x		x		x
					4		-		-		x		xxx		x		xxx
					5		x		x		x		xxx
					6		-		-
					7		-		-
					8		x		x		x		x
					9		-		-
					10		-		-		x		x
					11		x		x		x		x
					12		x		x		x		x
					13		-		-
				2	1		x		x
					2		-		-
					3		-		-		x		x		x		x
					4		-		-
					5		-		-
					6		-		-		-		-		x		x
					7		-		-
					8		x		x		x		x		x		x		x		x
					9		-		-
					10		-		-
					11		-		-
					12		-		-		x		x		x		x
					13						x		x						x		x
					14						x		x								x
				3	1		-		-
					2		-		-
					3		-		-		x		x				x
					4		x		x		x		x		x		x		x		x
					5		-		-
					6		-		-
					7		-		-
					8						x		x
					9		-		-
					10		-		-

## Sheet: Sheet8
			stage 1 NC	stage 1 O	stage2 NC	stage 2 O	stage 3 Nc	stage 3 O	stage 4 NC	stage 4 O	stage5 NC	stage 5 O	stage 6 NC	stage 6 O		p53null
	p53null	rep 1	5 of 13	5 of 13	7 of 13	7	1	1
		rep 2	2 of 14	2 of 14	5	5	4	4	2	3
		rep 3	1 of 10	1	3	3	1	1	1	1
			stage 1 NC	stage 1 O	stage2 NC	stage 2 O	stage 3 Nc	stage 3 O	stage 4 NC	stage 4 O
	p53 null		38.4	38.4	53.8	53.8	7.6	7.6
			14.2	14.2	35.7	35.7	28.5	28.5	14.2	14.2
			10	10	30	30	10	10	10	10
		average	55.9	55.9	39.8	39.8	15.3	15.3	8	8
			stage 1 NC	stage 1 O	stage2 NC	stage 2 O	stage 3 Nc	stage 3 O	stage 4 NC	stage 4 O
		g-H2Av +ve (%)	55.9	55.9	39.8	39.8	15.3	15.3	8	8
																	p53null;okra
			stage 1 NC	stage 1 O	stage2 NC	stage 2 O	stage 3 Nc	stage 3 O	stage 4 NC	stage 4 O	stage5 NC	stage 5 O	stage 6 NC	stage 6 O
	p53 null; okra	rep 1	8 of 11	10	11	11	9	9	4	5		2		1
		rep 2	10 of 21	13	21	21	19	21	6	8	3	8	1	1
		rep 3	8 of 15	8	13	15	12	15	3	5		1
			72,7	72.7	100	100	81.8	81.8	36.3	45.4		18		9
			47.6	61.9	100	100	90.4	100	28.5	38	14.2	38	4.7	4.7
			53.3	53.3	86.6	100	80	100	20	41.6		6.6
		average	57.8	62.6	95.5	100	84	97.2	28.2	41.6	4.7	20.8	1.56	4.5
			stage 1 NC	stage 1 O	stage2 NC	stage 2 O	stage 3 Nc	stage 3 O	stage 4 NC	stage 4 O	stage5 NC	stage 5 O	stage 6 NC	stage 6 O
		g-H2Av +ve (%)	57.8	62.6	95.5	100	84	97.2	28.2	41.6	4.7	20.8	1.56	4.5

## Sheet: Nurse cells
	NC Stage 1	NC Stage 2	NC Stage 3	NC stage 4	NC Stage 5	NC Stage 6
WT	0	0	0	0	0	0
okra-	56.6	40	16.6	0	0	0
p53-	55.9	39.8	15.3	8	0	0
okra- p53-	57.8	95.5	84	28.2	4.7	1.56
p53A-	10	0	0	0	0	0
okra-p53A-	0	0	0	0	0	0
p53B-	75	10	0	0	0	0
okra-p53B-	100	100	100	100	85	75

## Sheet: Oocyte
	O Stage 1	O Stage 2	O Stage 3	O stage 4	O Stage 5	O Stage 6
Strain
WT	3.3	0	0	0	0	0
okra-	94.4	88.8	46.6	0	0	0
p53-	55.9	39.8	15.3	8	0	0
okra- p53-	62.6	100	97.2	41.6	20.8	4.5
p53A-	25	0	0	0	0	0
okra-p53A-	100	100	95	90	100	100
p53B-	90	15	0	0	0	0
okra-p53B-	100	100	100	100	100	75

[truncated: 1 more sheets: NC + O]
