# Supplementary material for: Drosophila p53 isoforms have overlapping and distinct functions in germline genome integrity and oocyte quality control
Source: eLife. 2022 Jan 13;11:e61389. doi: 10.7554/eLife.61389 (PMC8758136; doi:10.7554/eLife.61389)
Supplement: Figure 7—figure supplement 2—source data 1. [file elife-61389-fig7-figsupp2-data1.xlsx]

## Sheet: Sheet1
Genotype	Class I	Class II	Class III	Class IV	total
p53A+B+	100	0	0	0	100
p53A-B-	191	0	32	26	250
p53A-B+	99	0	0	1	100
p53A+B-	83	35	6	3	127
Genotype	Class I	Class II	Class III	Class IV
p53A+B+	100	0	0	0
p53A-B-	76.4	0	12.8	10.4
p53A-B+	99	0	0	1
p53A+B-	65.3543	27.5591	4.72441	2.3622
okr;p53A+B+	30.1205	51.8072	9.63855	8.43373
okr;p53A-B-	7.40741	16.6667	0	75.9259
okr;p53A-B+	55.3398	32.0388	2.91262	9.70874
okr;p53A+B-	24.4726	67.5105	4.64135	3.37553
