# Supplementary material for: Drosophila p53 isoforms have overlapping and distinct functions in germline genome integrity and oocyte quality control
Source: eLife. 2022 Jan 13;11:e61389. doi: 10.7554/eLife.61389 (PMC8758136; doi:10.7554/eLife.61389)
Supplement: Figure 7—figure supplement 3—source data 1. [file elife-61389-fig7-figsupp3-data1.xlsx]

## Sheet: Sheet1
Hatch rate counts p53* 6_18_21
plates	6/10-6/11			2021-06-14			2021-06-15			2021-06-16
population	21 hours			4 hours			4 hours			4 hours
	hatch	total	%			%			%			%		% mean	S.D.
w[1118]	48	50	96	43	50	86	47	50	94	48	50	96		93	4.76095
p53[5A-1-4]	45	50	90	32	50	64	29	50	58	27	50	54		66.5	16.1967
p53[A2.3]	27	50	54	11	32	34.375	30	50	60	29	50	58		51.5938	11.7471
p53[B41.5]	23	50	46	5	50	10	14	33	42.4242	20	50	40		34.6061	16.5881
Genotype	% hatch	S.D.	2 tail P vs w[1118]
w[1118]	93	4.76095
p53[5A-1-4]	66.5	16.1967	0.0217
p53[A2.3]	51.5938	11.7471	0.0006
p53[B41.5]	34.6061	16.5881	0.0005
		hours
	21	25	27.5	49
w[1118]	24	44	46	47
p53[5A-1-4]	10	27	27	29
p53[A2.3]	4	19	24	30
p53[B41.5]	3	12	12	14
