# Supplementary material for: Drosophila p53 isoforms have overlapping and distinct functions in germline genome integrity and oocyte quality control
Source: eLife. 2022 Jan 13;11:e61389. doi: 10.7554/eLife.61389 (PMC8758136; doi:10.7554/eLife.61389)
Supplement: Figure 7—source data 2. [file elife-61389-fig7-data2.xlsx]

## Sheet: Sheet1
yw	replicate	ovariole	Compact karyosome S5/6				okra-	replicate	ovariole	Karyosome compact like WT			Karyosome semi compact			Karyosome not compact
	1	1	x					1	1							x
		2	x						2							x
		3	x						3							x
		4	x						4	x
		5	x						5
		6	x						6				x
		7	x						7							x
		8	x						8							x
		9	x						9							x
		10	x						10							x
									11				x
	2	1	x						12							x
		2	x						13							x
		3	x						14							x
		4	x						15							x
		5	x						16							x
		6	? Staining looks weird						17							x
		7	x
		8	x
		9	x				okra-	replicate	ovariole	Karyosome compact like WT			Karyosome semi compact			Karyosome not compact
		10	x					2	1							x
									2							x
									3	Hard to tell, no c3G staining
									4							x
									5							x
									6							x
									7
									8				x
									9							x
									10							x
									11							x
									12							x
									13							x
									14							x
									15				x
									16							x
									17							x
									18							x
									19							x
									20							x
									21							x
									22

## Sheet: Sheet2
	p53 null	replicate	ovariole	Karyosome compact like WT			Karyosome semi compact			Karyosome not compact
		1	1	x
			2	x
			3	x
			4	x
			5	x
			6	x
			7	x
			8	x
			9	maybe
			10	x
			11	x
			12				x
			13	x
		2	1	x
			2	x
			3	x
			4	x
			5	x
			6	x
			7	x
			8	x
			9	x
okra null p53 null		replicate	ovariole	atleast oneKaryosome compact like WT						Karyosome semi compact				Karyosome not compact
		1	1	x
			2	x										x
			3
			4	x										x
			5
			6	x
			7	x
			8							x
			9	x
			10	x
			11	x
			12	x
			13	x
			14							x
			15	x
			16							x
			17	x
			18	x						x
			19											x
			20	x
			21	x
			22	x
			23											x
			24											x
			25	x
			26	x
			27	x
			28	x
			29	x
		2	1	x
			2	x
			3	x
			4											x
			5											x
			6	x
			7	x
			8											x
			9	x
			10	?
			11	x
			12	x
			13											x
			14											x
			15											x
			16	x
			17	x
			18	x
			19	x
			20	x
			21	x
			22							x
			23							x
			24	x
			25	x
			26	x
			27	x
			28	x
			29	?
			30	x
			31	?
			32											x
			33	x

## Sheet: Analysis of Sheet 1 and 2
		WT	100
		okra-	3
		okra-p53-	55

## Sheet: Sheet3
	A Crispr	replicate	ovariole	Karyosome compact like WT			Karyosome semi compact			Karyosome not compact
		1	1	x
			2	x
			3	x
			4	x
			5	x
			6	x
			7	x
			8	x
			9	x
			10	x
			11	x
			12	x
		2	1	x
			2	x
			3	x
			4	x
			5	x
			6	x
			7	x
			8	x
			9	x
			10	x
	okra-A-	replicate	ovariole	Karyosome compact like WT			Karyosome semi compact			Karyosome not compact
		1	1				x
			2				x
			3				x
			4							x
			5				x
			6				x
			7				x
			8				? Dapi too faint
			9							x
			10				x
			11				x
			12	x
			13							x
			14							x
			16				x
			16				x
			17				x
			18				x
		2	1	x
			2				x
			3				x
			4				x
			5							x
			6				x
			7				x
			8				x
			9				x
			10				x
			11							x
			12							x
			13
			14				x
			16				x
			16				x
			17				x
			18				x
			19							x
			20				x
			21							x
			22				x

## Sheet: Sheet4
	B Crispr	replicate	ovariole	Karyosome compact like WT			Karyosome semi compact			Karyosome not compact
		1	1	x
			2	x
			3	x
			4	x
			5	x
			6	x
			7	x
			8	x
			9	x
			10	x
		2	1	x
			2	x
			3	x
			4	x
			5	x
			6	x
			7	x
			8	x
			9	x
			10	x
	okra-B-	replicate	ovariole	Karyosome compact like WT			Karyosome semi compact			Karyosome not compact
		1	1				x
			2				x
			3							x
			4							x
			5							x
			6				x
			7				x
			8				x
			9				x
			10				x
			11				x
			12				x
			13				x
		2	1				x
			2				x
			3				x
			4	x
			5	x
			6				x
			7				x
			8				x
			9				x
			10							x
			11				x
			12							x
			13							x
			14	x
			15				x
			16				x
			17				x
